# Supplementary material for: The MAPK Signaling Cascade is a Central Hub in the Regulation of Cell Cycle, Apoptosis and Cytoskeleton Remodeling by Tripeptidyl-Peptidase II
Source: PubMed Central journal article supplement (PMC2733081; doi:10.4137/grsb.s882), 2008-11-24
Supplement: Table_S1.pdf [file Table_S1.pdf]

**Table 1. List of modulated genes on TPPII knockdown.**

| Probe set                                    | Gene Symbol | Gene title                                                                     | Avg-SLR | SD-SLR | Fold change |
|----------------------------------------------|-------------|--------------------------------------------------------------------------------|---------|--------|-------------|
| <b>Apoptosis (10)</b>                        |             |                                                                                |         |        |             |
| 211338_at                                    | IFNA2       | Interferon alpha 2                                                             | 1.57    | 0.40   | 2.96        |
| 242714_at                                    | MAP3K5      | Mitogen-activated protein kinase kinase kinase 5                               | 1.27    | 0.60   | 2.41        |
| 214581_x_at                                  | TNFRSF21    | Tumor necrosis factor receptor superfamily member 21                           | 0.87    | 0.25   | 1.82        |
| 216321_s_at                                  | NR3C1       | Nuclear receptor subfamily 3 group C member 1                                  | -0.60   | 0.10   | 1.52        |
| 211509_s_at                                  | RTN4        | Reticulon 4                                                                    | -0.67   | 0.06   | 1.59        |
| 212501_at                                    | CEBPB       | CCAAT/enhancer binding protein (C/EBP) beta                                    | -0.67   | 0.15   | 1.59        |
| 226297_at                                    | HIPK3       | Homeodomain interacting protein kinase 3                                       | -0.80   | 0.10   | 1.74        |
| 202803_s_at                                  | ITGB2       | Integrin beta 2                                                                | -0.83   | 0.31   | 1.78        |
| 221478_at                                    | BNIP3L      | BCL2/adenovirus E1B 19kda interacting protein 3-like                           | -0.87   | 0.21   | 1.82        |
| 213883_s_at                                  | TM2D1       | Beta-amyloid binding protein precursor                                         | -1.67   | 0.25   | 3.17        |
| <b>Cell cycle (23)</b>                       |             |                                                                                |         |        |             |
| 226841_at                                    | MPEG1       | Macrophage expressed gene 1                                                    | 1.87    | 0.49   | 3.65        |
| 215723_s_at                                  | PLD1        | Phospholipase D1 phosphatidylcholine-specific                                  | 1.10    | 0.50   | 2.14        |
| 209960_at                                    | HGF         | Hepatocyte growth factor (hepapoietin A; scatter factor)                       | 1.03    | 0.23   | 2.05        |
| 212096_s_at                                  | MTUS1       | Mitochondrial tumor suppressor 1                                               | 0.67    | 0.15   | 1.59        |
| 224621_at                                    | MAPK1       | Mitogen-activated protein kinase 1 (LOC440806)                                 | -0.57   | 0.06   | 1.48        |
| 202174_s_at                                  | PCM1        | Pericentriolar material 1                                                      | -0.57   | 0.12   | 1.48        |
| 238075_at                                    | CHEK1       | Cell cycle checkpoint kinase                                                   | -0.60   | 0.10   | 1.52        |
| 225662_at                                    | ZAK         | Sterile alpha motif and leucine zipper containing kinase AZK                   | -0.67   | 0.21   | 1.59        |
| 223195_s_at                                  | SESN2       | Sestrin 2, Hypoxia induced gene 95                                             | -0.70   | 0.35   | 1.62        |
| 226994_at                                    | DNAJA2      | Dnaj (Hsp40) homolog subfamily A member 2                                      | -0.70   | 0.35   | 1.62        |
| 202240_at                                    | PLK1        | Polo-like kinase 1 (Drosophila)                                                | -0.80   | 0.26   | 1.74        |
| 215260_s_at                                  | TCF3        | Transcription factor 3 (E2A immunoglobulin enhancer binding factors E12/E47)   | -0.80   | 0.17   | 1.74        |
| 223238_s_at                                  | PBRM1       | Polybromo 1 (mitosis)                                                          | -0.83   | 0.31   | 1.78        |
| 202315_s_at                                  | BCR         | Breakpoint cluster region                                                      | -0.87   | 0.12   | 1.82        |
| 204891_s_at                                  | LCK         | Lymphocyte-specific protein tyrosine kinase                                    | -0.90   | 0.30   | 1.87        |
| 218507_at                                    | HIG2        | Hypoxia-inducible protein 2                                                    | -0.93   | 0.35   | 1.91        |
| 226191_at                                    | GSK3B       | Glycogen synthase kinase 3 beta                                                | -1.00   | 0.10   | 2.00        |
| 204999_s_at                                  | ATF5        | Activating transcription factor 5                                              | -1.07   | 0.35   | 2.09        |
| 226048_at                                    | MAPK8       | Mitogen-activated protein kinase 8                                             | -1.10   | 0.26   | 2.14        |
| 222633_at                                    | TBL1XR1     | Transducin (beta)-like 1X-linked receptor 1 (HDAC 3 sub)                       | -1.13   | 0.15   | 2.19        |
| 219812_at                                    | STAG3       | Stromal antigen 3                                                              | -1.13   | 0.25   | 2.19        |
| 225953_at                                    | P15RS       | Cyclin-dependent kinase inhibitor-related protein                              | -1.20   | 0.26   | 2.30        |
| 212331_at                                    | RBL2        | Retinoblastoma-like 2 (p130)                                                   | -1.43   | 0.15   | 2.70        |
| <b>Cytoskeleton, adhesion, motility (17)</b> |             |                                                                                |         |        |             |
| 214957_at                                    | ACTL8       | Actin like protein                                                             | 2.57    | 0.06   | 5.92        |
| 214087_s_at                                  | MYBPC1      | Myosin binding protein C slow type                                             | 1.93    | 0.15   | 3.82        |
| 205337_at                                    | DCT         | Dopachrome tautomerase (dopachrome delta-isomerase tyrosine-related protein 2) | 1.63    | 0.57   | 3.10        |
| 205114_s_at                                  | CCL3        | Chemokine (C-C motif) ligand 3                                                 | 1.53    | 0.60   | 2.89        |
| 215565_at                                    | DTNB        | Dystrobrevin                                                                   | 1.13    | 0.35   | 2.19        |
| 219737_s_at                                  | PCDH9       | Protocadherin 9                                                                | 1.03    | 0.49   | 2.05        |
| 205352_at                                    | SERPINI1    | Serine (or cysteine) proteinase inhibitor clade I (neuroserpin) member 1       | 1.00    | 0.17   | 2.00        |
| 217853_at                                    | TNS3        | Tensin-like SH2 domain containing 1                                            | 0.70    | 0.10   | 1.62        |
| 208195_at                                    | TTN         | Titin                                                                          | 0.63    | 0.15   | 1.55        |
| 212877_at                                    | KLC1        | Kinesin 2 60/70kda                                                             | -0.57   | 0.06   | 1.48        |

|             |          |                                                     |       |      |      |
|-------------|----------|-----------------------------------------------------|-------|------|------|
| 208786_s_at | MAP1LC3B | Microtubule-associated protein 1 light chain 3 beta | -0.67 | 0.15 | 1.59 |
| 239329_at   | RAB21    | RAB21 member RAS oncogene family                    | -0.70 | 0.17 | 1.62 |
| 201656_at   | ITGA6    | Integrin alpha 6                                    | -0.80 | 0.10 | 1.74 |
| 228603_at   | ACTR3    | ARP3 actin-related protein 3 homolog (yeast)        | -1.00 | 0.26 | 2.00 |
| 203763_at   | DYNC2LI1 | Dynein 2 light intermediate chain                   | -1.27 | 0.40 | 2.41 |
| 208353_x_at | ANK1     | Ankyrin 1 erythrocytic                              | -1.43 | 0.55 | 2.70 |
| 213241_at   | PLXNC1   | Plexin C1                                           | -1.67 | 0.25 | 3.17 |

### Immune response (6)

|             |          |                                                             |       |      |      |
|-------------|----------|-------------------------------------------------------------|-------|------|------|
| 204747_at   | IFIT3    | Interferon-induced protein with tetratricopeptide repeats 3 | 0.83  | 0.32 | 1.78 |
| 223751_x_at | TLR10    | Toll-like receptor 10                                       | 0.80  | 0.17 | 1.74 |
| 204439_at   | IFI44L   | Interferon-induced protein 44-like                          | 0.63  | 0.15 | 1.55 |
| 221349_at   | VPREB1   | Pre-B lymphocyte gene 1                                     | -1.17 | 0.32 | 2.24 |
| 207861_at   | CCL22    | Chemokine (C-C motif) ligand 22                             | -1.63 | 0.25 | 3.10 |
| 212314_at   | KIAA0746 | KIAA0746 protein                                            | -1.23 | 0.15 | 2.35 |

### Metal ion binding & Ion Transport (9)

|             |         |                                                                |       |      |      |
|-------------|---------|----------------------------------------------------------------|-------|------|------|
| 231935_at   | ARPP-21 | Cyclic AMP-regulated phosphoprotein 21 kd nucleic acid binding | 1.43  | 0.32 | 2.70 |
| 242625_at   | RSAD2   | Radical S-adenosyl methionine domain containing 2              | 1.40  | 0.56 | 2.64 |
| 221646_s_at | ZDHHC1  | Zinc finger DHHC domain containing 11                          | 1.27  | 0.21 | 2.41 |
| 234034_at   | KCNMB4  | Potassium large conductance calcium-activated channel          | 1.27  | 0.47 | 2.41 |
| 219360_s_at | TRPM4   | Transient receptor potential cation channel                    | 0.80  | 0.36 | 1.74 |
| 213164_at   | SLC5A3  | Solute carrier family 5 (inositol transporters) member 3       | 0.57  | 0.12 | 1.48 |
| 212690_at   | DDHD2   | DDHD domain containing 2                                       | -1.20 | 0.30 | 2.30 |
| 219270_at   | CHAC1   | Chac cation transport regulator-like 1                         | -1.30 | 0.26 | 2.46 |
| 202919_at   | PREI3   | Preimplantation protein 3                                      | -1.30 | 0.10 | 2.46 |

### Meabolism (20)

|              |          |                                                          |       |      |      |
|--------------|----------|----------------------------------------------------------|-------|------|------|
| 209994_s_at  | ABC1     | ATP-binding cassette sub-family B (MDR/TAP) 1            | 1.90  | 0.75 | 3.73 |
| 207819_s_at  | ABC4     | ATP-binding cassette sub-family B (MDR/TAP) 4            | 1.77  | 0.74 | 3.40 |
| 1554474_a_at | MOXD1    | Monoxygenase DBH-like 1                                  | 1.10  | 0.46 | 2.14 |
| 211138_s_at  | KMO      | Kynurenine 3-monoxygenase (kynurenine 3-hydroxylase)     | 0.77  | 0.15 | 1.70 |
| 223220_s_at  | PARP9    | Poly (ADP-ribose) polymerase family member 9             | 0.70  | 0.20 | 1.62 |
| 210046_s_at  | IDH2     | Isocitrate dehydrogenase 2 (NADP+) mitochondrial         | -0.50 | 0.00 | 1.41 |
| 203302_at    | DCK      | Deoxycytidine kinase                                     | -0.60 | 0.10 | 1.52 |
| 208660_at    | CS       | Citrate synthase                                         | -0.60 | 0.17 | 1.52 |
| 212174_at    | AK2      | Adenylate kinase 2                                       | -0.60 | 0.10 | 1.52 |
| 225007_at    | G3BP     | Ras-GTPase-activating protein SH3-domain-binding protein | -0.60 | 0.10 | 1.52 |
| 201660_at    | ACSL3    | Acyl-coA synthetase long-chain family member 3           | -0.73 | 0.06 | 1.66 |
| 223062_s_at  | PSAT1    | Phosphoserine aminotransferase 1                         | -0.77 | 0.25 | 1.70 |
| 202119_s_at  | CPNE3    | Copine III                                               | -0.83 | 0.12 | 1.78 |
| 209610_s_at  | SLC1A4   | Glutamate/neutral amino acid transporter                 | -0.87 | 0.35 | 1.82 |
| 217989_at    | HSD17B11 | hydroxysteroid (17-beta) dehydrogenase 11                | -0.87 | 0.23 | 1.82 |
| 203067_at    | PDHX     | Pyruvate dehydrogenase complex component X               | -0.97 | 0.06 | 1.95 |
| 217870_s_at  | CMPK     | UMP-CMP kinase                                           | -1.00 | 0.10 | 2.00 |
| 201313_at    | ENO2     | Enolase 2 (gamma neuronal)                               | -1.07 | 0.15 | 2.09 |
| 226894_at    | SLC35A3  | (UDP-N-acetylglucosamine (UDP-glcnac) transporter)       | -1.10 | 0.26 | 2.14 |
| 207076_s_at  | ASS1     | Argininosuccinate synthetase                             | -2.07 | 0.25 | 4.19 |

### Protein biosynthesis & transport (11)

|           |         |                                                        |       |      |      |
|-----------|---------|--------------------------------------------------------|-------|------|------|
| 200699_at | KDELR2  | KDEL (Lys-Asp-Glu-Leu) ER protein retention receptor 2 | -0.60 | 0.10 | 1.52 |
| 227808_at | DNAJC15 | Dnaj (Hsp40) homolog subfamily D member 1              | -0.63 | 0.15 | 1.55 |
| 204169_at | IMPDH1  | IMP (inosine monophosphate) dehydrogenase 1            | -0.63 | 0.15 | 1.55 |

|           |         |                                                                              |       |      |      |
|-----------|---------|------------------------------------------------------------------------------|-------|------|------|
| 226119_at | PCMTD1  | Protein-L-isoaspartate (D-aspartate) O-methyltransferase domain containing 1 | -0.67 | 0.15 | 1.59 |
| 231894_at | SARS    | Seryl-trna synthetase                                                        | -0.70 | 0.10 | 1.62 |
| 213310_at | EIF2C2  | Eukaryotic translation initiation factor 2C 2                                | -0.90 | 0.10 | 1.87 |
| 227134_at | SYTL1   | Synaptotagmin-like 1                                                         | -0.93 | 0.32 | 1.91 |
| 212812_at | SERINC5 | Serine incorporator 5                                                        | -1.00 | 0.17 | 2.00 |
| 222627_at | VPS54   | Vacuolar protein sorting 54 (yeast)                                          | -1.00 | 0.20 | 2.00 |
| 209921_at | SLC7A11 | (Cationic amino acid transporter y <sup>+</sup> system) member 11            | -1.07 | 0.35 | 2.09 |
| 209628_at | NXT2    | Nuclear transport factor 2-like export factor 2                              | -1.43 | 0.25 | 2.70 |

### Proteolysis (12)

|              |          |                                                                                        |       |      |      |
|--------------|----------|----------------------------------------------------------------------------------------|-------|------|------|
| 1553499_s_at | SERPINA9 | Serine (or cysteine) proteinase inhibitor clade A (alpha-1 antiproteinase antitrypsin) | 1.97  | 0.15 | 3.91 |
| 228055_at    | NAPSB    | Napsin B aspartic peptidase pseudogene                                                 | 1.27  | 0.40 | 2.41 |
| 203279_at    | EDEM1    | ER degradation enhancer mannosidase alpha-like 1                                       | -0.60 | 0.17 | 1.52 |
| 226106_at    | RNF141   | Ring finger protein 141                                                                | -0.67 | 0.29 | 1.59 |
| 226921_at    | UBR1     | Ubiquitin protein ligase E3 component n-recogin 1                                      | -0.77 | 0.23 | 1.70 |
| 223132_s_at  | TRIM8    | Tripartite motif-containing 8                                                          | -0.80 | 0.10 | 1.74 |
| 220419_s_at  | USP25    | Ubiquitin specific protease 25                                                         | -0.83 | 0.06 | 1.78 |
| 228822_s_at  | USP16    | Ubiquitin specific protease 16                                                         | -0.93 | 0.21 | 1.91 |
| 226343_at    | DPP8     | Dipeptidyl peptidase 8 isoform 3, Similar to NP_932064.1                               | -0.93 | 0.21 | 1.91 |
| 226140_s_at  | OTUD1    | OTU domain containing 1                                                                | -1.17 | 0.49 | 2.24 |
| 226326_at    | PCGF5    | Polycomb group ring finger 5                                                           | -1.40 | 0.20 | 2.64 |
| 203374_s_at  | TPP2     | Tripeptidyl peptidase II                                                               | -1.50 | 0.10 | 2.83 |

### Signal transduction (28)

|             |           |                                                                    |       |      |      |
|-------------|-----------|--------------------------------------------------------------------|-------|------|------|
| 206084_at   | PTPRR     | Protein tyrosine phosphatase receptor type R                       | 1.83  | 0.32 | 3.56 |
| 223343_at   | MS4A7     | Membrane-spanning 4-domains subfamily A member 7                   | 1.73  | 0.40 | 3.32 |
| 205798_at   | IL7R      | Interleukin 7 receptor                                             | 1.30  | 0.62 | 2.46 |
| 238623_at   | MAP3K4    | Mitogen-activated protein kinase kinase kinase 4                   | 1.23  | 0.58 | 2.35 |
| 209795_at   | CD69      | CD69 antigen (p60 early T-cell activation antigen)                 | 1.13  | 0.21 | 2.19 |
| 201760_s_at | WSB2      | WD repeat and SOCS box-containing 2                                | 0.77  | 0.29 | 1.70 |
| 225572_at   | FAM119A   | CAMP responsive element binding protein 1                          | -0.60 | 0.10 | 1.52 |
| 209307_at   | SWAP70    | Switch-associated protein 70                                       | -0.60 | 0.10 | 1.52 |
| 202442_at   | AP3S1     | Adaptor-related protein complex 3 sigma 1 subunit                  | -0.63 | 0.15 | 1.55 |
| 224596_at   | SLC44A1   | CDW92 antigen                                                      | -0.67 | 0.06 | 1.59 |
| 220351_at   | CCRL1     | Chemokine (C-C motif) receptor-like 1                              | -0.73 | 0.23 | 1.66 |
| 226370_at   | KLHL15    | Kelch-like 15 (Drosophila)                                         | -0.73 | 0.12 | 1.66 |
| 213531_s_at | RAB3GAP1  | RAB3 GTPase-activating protein                                     | -0.77 | 0.25 | 1.70 |
| 204993_at   | GNAZ      | Guanine nucleotide binding protein (G protein) alpha Z polypeptide | -0.80 | 0.17 | 1.74 |
| 208781_x_at | SNX3      | Sorting nexin 3                                                    | -0.83 | 0.06 | 1.78 |
| 217908_s_at | IQWD1     | IQ motif and WD repeats 1                                          | -0.83 | 0.25 | 1.78 |
| 226335_at   | RPS6KA3   | Ribosomal protein S6 kinase 90kda polypeptide 3                    | -0.87 | 0.15 | 1.82 |
| 226990_at   | GPIAP1    | GPI-anchored membrane protein 1                                    | -0.87 | 0.25 | 1.82 |
| 210970_s_at | IBTK      | Inhibitor of Bruton agammaglobulinemia tyrosine kinase             | -0.90 | 0.30 | 1.87 |
| 202974_at   | MPP1      | Membrane protein palmitoylated 1                                   | -0.93 | 0.15 | 1.91 |
| 225232_at   | MTMR12    | Phosphatidylinositol-3-phosphate associated protein                | -0.93 | 0.06 | 1.91 |
| 227945_at   | TBC1D1    | TBC1(tre-2/USP6 BUB2 cdc16) domain family member 1                 | -0.97 | 0.35 | 1.95 |
| 218493_at   | C16ORF33  | Chromosome 16 open reading frame 33                                | -0.97 | 0.15 | 1.95 |
| 203884_s_at | RAB11FIP2 | RAB11 family interacting protein 2 (class I)                       | -0.97 | 0.46 | 1.95 |
| 213379_at   | COQ2      | Coenzyme Q2 homolog, prenyltransferase (yeast)                     | -1.00 | 0.10 | 2.00 |
| 228662_at   | SOCS7     | Suppressor of cytokine signaling 7                                 | -1.10 | 0.26 | 2.14 |
| 201691_s_at | TPD52     | Tumor protein D52                                                  | -1.23 | 0.15 | 2.35 |
| 210587_at   | INHBE     | Inhibin beta E                                                     | -2.67 | 0.97 | 6.35 |

**Nucleic acid Binding (Replication, Transcription etc) (22)**

|              |           |                                                                          |       |      |      |
|--------------|-----------|--------------------------------------------------------------------------|-------|------|------|
| 209806_at    | HIST1H2BK | Histone 1 h2bk                                                           | 1.37  | 0.32 | 2.58 |
| 238447_at    | RBMS3     | RNA binding motif single stranded interacting protein                    | 1.13  | 0.06 | 2.19 |
| 215071_s_at  | HIST1H2AC | Histone 1 h2ac                                                           | 1.03  | 0.23 | 2.05 |
| 224828_at    | CPEB4     | Cytoplasmic polyadenylation element binding protein 4                    | 0.93  | 0.25 | 1.91 |
| 230795_at    | HIST2H4   | HIST2H4 histone 2 H4; complete cds                                       | 0.83  | 0.15 | 1.78 |
| 206102_at    | GINS1     | GINS complex subunit 1 (Psf1 homolog)                                    | -0.53 | 0.06 | 1.45 |
| 218152_at    | HMG20A    | High-mobility group 20A                                                  | -0.57 | 0.12 | 1.48 |
| 224830_at    | NUDT21    | Nudix (nucleoside diphosphate linked moiety X)-motif 21                  | -0.63 | 0.12 | 1.55 |
| 212612_at    | RCOR1     | REST corepressor 1                                                       | -0.63 | 0.15 | 1.55 |
| 219126_at    | PHF10     | PHD finger protein 10                                                    | -0.63 | 0.15 | 1.55 |
| 219433_at    | BCOR      | BCL6 co-repressor                                                        | -0.67 | 0.06 | 1.59 |
| 208984_x_at  | RBM10     | RNA binding motif protein 10                                             | -0.70 | 0.20 | 1.62 |
| 213720_s_at  | SMARCA4   | SWI/SNF related matrix associated actin dependent regulator of chromatin | -0.73 | 0.15 | 1.66 |
| 222476_at    | CNOT6     | CCR4-NOT transcription complex subunit 6                                 | -0.73 | 0.06 | 1.66 |
| 225159_s_at  | ELK4      | ETS-domain protein (SRF accessory protein 1)                             | -0.73 | 0.06 | 1.66 |
| 224928_at    | SETD7     | SET domain containing (lysine methyltransferase) 7                       | -0.73 | 0.21 | 1.66 |
| 230194_at    | LRPPRC    | Leucine-rich PPR-motif containing                                        | -0.80 | 0.35 | 1.74 |
| 212124_at    | RAI17     | Retinoic acid induced 17                                                 | -1.13 | 0.50 | 2.19 |
| 203640_at    | MBNL2     | Muscleblind-like 2 (Drosophila)                                          | -1.13 | 0.38 | 2.19 |
| 206115_at    | EGR3      | Early growth response 3                                                  | -1.17 | 0.55 | 2.24 |
| 203361_s_at  | MYCBP     | C-myc binding protein                                                    | -1.23 | 0.40 | 2.35 |
| 1555801_s_at | ZNF533    | Zinc finger protein 533                                                  | -2.17 | 0.21 | 4.49 |

**Unknown (27)**

|             |                        |                                                             |       |      |      |
|-------------|------------------------|-------------------------------------------------------------|-------|------|------|
| 231223_at   | CSMD1                  | CUB and Sushi multiple domains 1                            | 1.83  | 0.50 | 3.56 |
| 221973_at   | LOC150759              | Hypothetical protein LOC150759                              | 1.13  | 0.38 | 2.19 |
| 238429_at   | TMEM71                 | Hypothetical protein FLJ33069                               | 1.03  | 0.06 | 2.05 |
| 230451_at   | C1ORF136               | Chromosome 1 open reading frame 136                         | 1.00  | 0.30 | 2.00 |
| 227966_s_at | CCDC74A ///<br>CCDC74B | coiled-coil domain containing 74A /// 74B                   | 0.90  | 0.10 | 1.87 |
| 228195_at   | MGC13057               | Hypothetical protein MGC13057                               | 0.90  | 0.36 | 1.87 |
| 238674_at   | ---                    | ---                                                         | 0.57  | 0.12 | 1.48 |
| 212150_at   | KIAA0143               | KIAA0143 protein                                            | -0.53 | 0.06 | 1.45 |
| 219563_at   | C14ORF139              | Chromosome 14 open reading frame 139                        | -0.67 | 0.12 | 1.59 |
| 224759_s_at | C12ORF23               | Hypothetical protein MGC17943                               | -0.67 | 0.15 | 1.59 |
| 226276_at   | TMEM167                | transmembrane protein 167                                   | -0.67 | 0.15 | 1.59 |
| 226810_at   | C6ORF155               | Chromosome 6 open reading frame 155                         | -0.67 | 0.12 | 1.59 |
| 208809_s_at | C6ORF62                | Chromosome 6 open reading frame 62                          | -0.70 | 0.20 | 1.62 |
| 218187_s_at | C8ORF33                | Hypothetical protein FLJ20989                               | -0.70 | 0.26 | 1.62 |
| 212731_at   | ANKRD46                | Ankyrin repeat domain 46                                    | -0.80 | 0.26 | 1.74 |
| 212792_at   | DPY19L1                | Dpy-19-like 1                                               | -0.80 | 0.10 | 1.74 |
| 222391_at   | TMEM30A                | Transmembrane protein 30A                                   | -0.80 | 0.17 | 1.74 |
| 225224_at   | C20ORF112              | ---                                                         | -0.83 | 0.12 | 1.78 |
| 224844_at   | SLAIN2                 | SLAIN motif family, member 2                                | -0.87 | 0.21 | 1.82 |
| 228812_at   | ---                    | Transcribed locus weakly similar to NP_689672.2<br>MGC45438 | -0.87 | 0.21 | 1.82 |
| 217906_at   | KLHDC2                 | Kelch domain containing 2                                   | -0.90 | 0.26 | 1.87 |
| 227638_at   | KIAA1632               | KIAA1632                                                    | -0.93 | 0.31 | 1.91 |
| 231035_s_at | ---                    | ---                                                         | -0.93 | 0.12 | 1.91 |
| 1562610_at  | IMAGE:483              | Homo sapiens clone IMAGE:4830466                            | -1.00 | 0.36 | 2.00 |
| 221477_s_at | MGC5618                | FLJ43505 protein                                            | -1.13 | 0.12 | 2.19 |
| 228242_at   | ---                    | ---                                                         | -1.23 | 0.42 | 2.35 |
| 224502_s_at | KIAA1191               | KIAA1191 protein                                            | -1.53 | 0.06 | 2.89 |
